# Supplementary material
Source: publisher figshare collection journal article supplement (https://acs.figshare.com/ndownloader/files/8333804)
Supplement: Supplementary file 1 [file 8333804]

## ACS LIVESLIDES RELEASE

### AUTHOR AUTHORIZATION FOR USE OF VOICE AND WARRANTY OF PERMISSION FOR NON-ACS CONTENT

#### AUTHORIZATION FOR USE OF VOICE AND/OR LIKENESS

I hereby grant to the American Chemical Society (ACS) the right and permission to record, use, publish, post on an ACS Web site, and copyright audio/video slideshow presentations that include the recording of voice, the transcription of remarks, and likeness of the authors of the published article. Such right and permission includes, but is not limited to, the authors' names, recorded voice or video, photograph or likeness, biographical information, or any material based upon or derived therefrom.

ACS shall have the right to use any material in the published audio/video slideshow presentation, including, but not limited to, for print or online marketing and promotional purposes, provided that the scientific meaning and integrity of the content is not compromised.

I hereby grant a non-exclusive unrestricted worldwide perpetual license to ACS to use these materials as stated above. I have no right of approval, and no claim for compensation for the use of this material.

I understand that the voice used in the presentation is limited to only the author or coauthors of a particular manuscript.

#### WARRANTY OF PERMISSION FOR NON-ACS CONTENT

I hereby warrant that I have obtained written permission from non-ACS copyright owners/publishers of content included in the presentation. I understand that all remaining content included in the presentation is limited to content that appears in my corresponding manuscript.

AE  
✓

I have read and agree to the above terms.

Name: Alexis Eugene

Signature: Alexis Eugene Date: 4-25-17
